# Supplementary material
Source: PubMed Central journal article supplement (PMC4685749)
Supplement: NIHMS66178-supplement-Supplementary_Figures___Tables.pdf [file NIHMS66178-supplement-Supplementary_Figures___Tables.pdf]

C

```

SP|sp|Q9Y3B3|TMED7_HUMAN|TMED7_HUMAN    MPRPGSAQRWAAVAGRWGCRLLAL--LLLVPGPGGASEITFELPDNAKQCFYEDIAQGK 58
SP|sp|D3ZTX0|TMED7_RAT|TMED7_RAT        MPRPRSATCWAAAAGRWGCRLLALLLLLLLPGPSGGSEITFELPDNAKQCFYEDITQGK 60
TR|tr|D3YZZ5|D3YZZ5_MOUSE|D3YZZ5_MOUSE MPRPGSAPRWAAAAGRWGCRLLAL--LLLLPAPSGGSEITFELPDNAKQCFYEDITQGK 58
TR|tr|H2QRC6|H2QRC6_PANTR|H2QRC6_PANTR  MPRPGSAQRWAAVAGRWGCRLLAL--LLLVPGPGGASEITFELPDNAKQCFYEDIAQGK 58
TR|tr|A4IFT6|A4IFT6_BOVIN|A4IFT6_BOVIN  MPRLGSAPRWAAAAGRWGCRLLVLL-LFLVPGPGGASEITFELPDNAKQCFYEDITQGK 59
TR|tr|Q6NWX3|Q6NWX3_DANRE|Q6NWX3_DANRE -MA-----GSSLSSWLLPLFV-QVVMKVGLSASELTFELPDNAKQCFYEDITIGK 51
TR|tr|F1RLE5|F1RLE5_PIG|F1RLE5_PIG      MPRLGSAQRWAAAAGRWGCRLLVLL--LLLVPGPGGASEITFELPDNAKQCFYEDITQGK 59
TR|tr|H9ESZ1|H9ESZ1_MACMU|H9ESZ1_MACMU  MPRPGSAQRWAAAAGRWGCRLLAL--LLLVPGPGGASEITFELPDNAKQCFYEDIAQGK 58
TR|tr|F6QDX4|F6QDX4_HORSE|F6QDX4_HORSE  MLRPGSARRWLAAAGRWGCRLLALL--LLVPGPGGASEITFELPDNAKQCFYEDITQGK 58
TR|tr|J9PB00|J9PB00_CANFA|J9PB00_CANFA  MPRPGSAQRWAAAAGRWGCRLLALLLLLLLPGPGGASEITFELPDNAKQCFYEDITQGK 60
                                     : . * *:. :: . ...*:*****: ***

SP|sp|Q9Y3B3|TMED7_HUMAN|TMED7_HUMAN    CTLEFQVITGGHYDVDCRLEDPDGKVLKEMKKQYDSFTFTASKNGTYKFCFSNEFSTFT 118
SP|sp|D3ZTX0|TMED7_RAT|TMED7_RAT        CTLEFQVITGGHYDVDCRLEDPDGKVLKEMKKQYDSFTFTASKNGTYKFCFSNEFSTFT 120
TR|tr|D3YZZ5|D3YZZ5_MOUSE|D3YZZ5_MOUSE CTLEFQVITGGHYDVDCRLEDPDGKVLKEMKKQYDSFTFTASKNGTYKFCFSNEFSTFT 118
TR|tr|H2QRC6|H2QRC6_PANTR|H2QRC6_PANTR  CTLEFQVITGGHYDVDCRLEDPDGKVLKEMKKQYDSFTFTASKNGTYKFCFSNEFSTFT 118
TR|tr|A4IFT6|A4IFT6_BOVIN|A4IFT6_BOVIN  CTLEFQVITGGHYDVDCRLEDPDGKVLKEMKKQYDSFTFTASKNGTYKFCFSNEFSTFT 119
TR|tr|Q6NWX3|Q6NWX3_DANRE|Q6NWX3_DANRE CTLEFQVITGGHYDVDCRLEDPEGTIVLYKEMKKQYDSFTFSAARNGTYKFCFSNEFSTFT 111
TR|tr|F1RLE5|F1RLE5_PIG|F1RLE5_PIG      CTLEFQVITGGHYDVDCRLEDPDGKVLKEMKKQYDSFTFTASKNGTYKFCFSNEFSTFT 119
TR|tr|H9ESZ1|H9ESZ1_MACMU|H9ESZ1_MACMU  CTLEFQVITGGHYDVDCRLEDPDGKVLKEMKKQYDSFTFTASKNGTYKFCFSNEFSTFT 118
TR|tr|F6QDX4|F6QDX4_HORSE|F6QDX4_HORSE  CTLEFQVITGGHYDVDCRLEDPDGKVLKEMKKQYDSFTFTASKNGTYKFCFSNEFSTFT 118
TR|tr|J9PB00|J9PB00_CANFA|J9PB00_CANFA  CTLEFQVITGGHYDVDCRLEDPDGKVLKEMKKQYDSFTFTASKNGTYKFCFSNEFSTFT 120
*****:*****:*.*****:*.*:*****

```

**Fig. S1. Bioinformatics analyses of TMED7 protein.** (A) Secondary structure prediction of TMED7 generated by PSIPRED v. 3.3. (B) Transmembrane domain prediction of TMED7 by TMHMM v. 2.0. Residues 186-208 were predicted to be part of the transmembrane helix with high confidence. The annotation ‘inside’ refers to extracellular or luminal whereas ‘outside’ is cytosolic. (C) Multiple amino acid sequence alignment of the TMED7 GOLD domain from different species generated using Clustal Omega. Residues in blue shade are the N-glycosylation motif Asn-Xaa-Ser/Thr where Xaa is any amino acid except P.

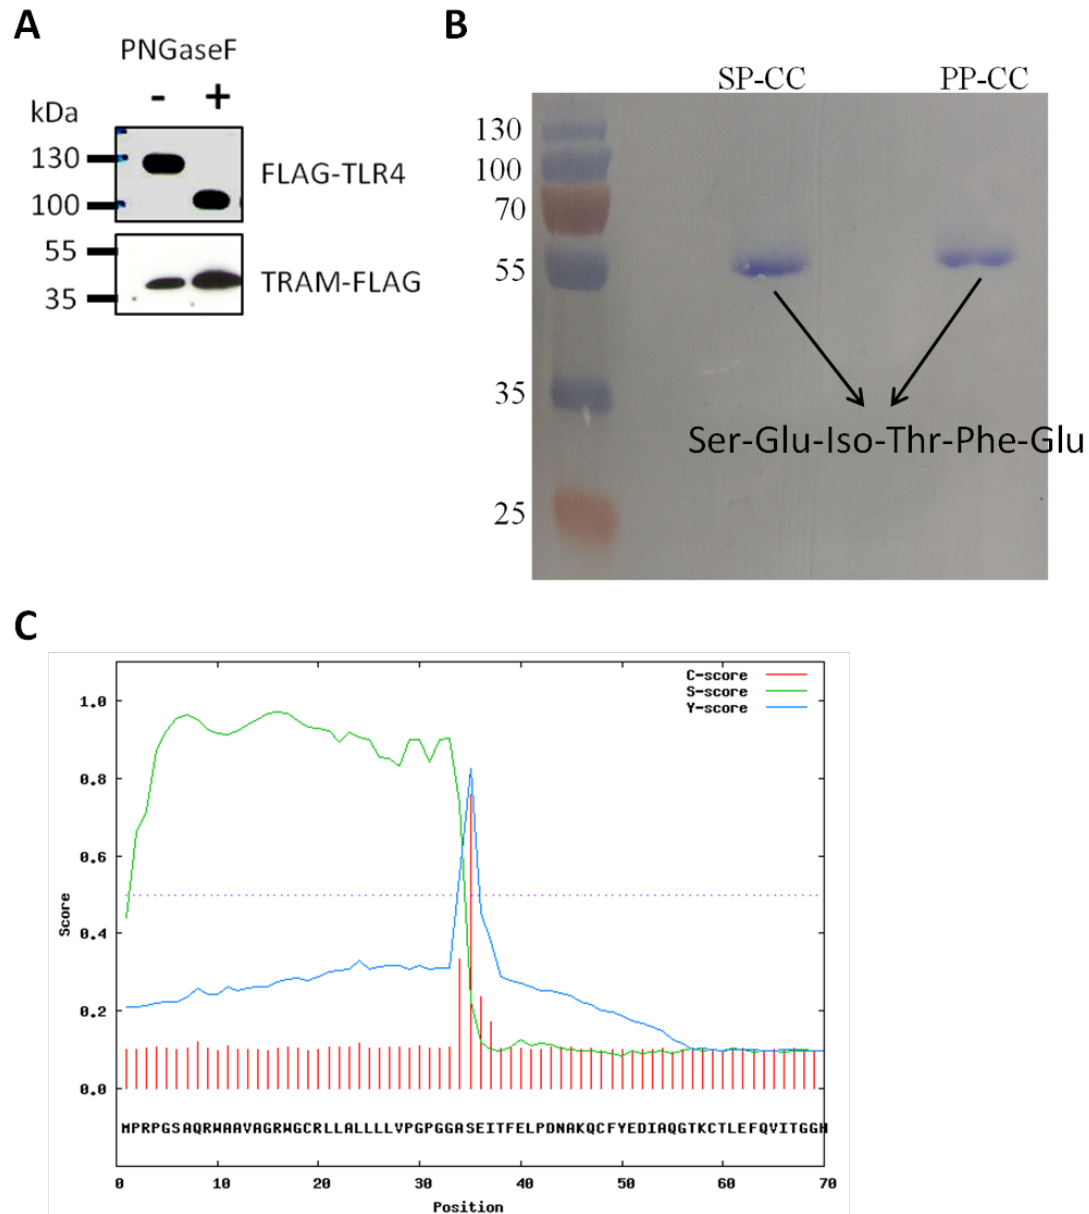

**Fig. S2. TMED7 is a type I transmembrane glycoprotein.** This figure is related to Figure 1. **(A)** FLAG-TLR4 and TRAM-FLAG were overexpressed in HEK293T cells and immunoprecipitated. Their glycosylation was confirmed by treatment with 1000 U PNGaseF and analyzed by Western blot. Western blots are representative of  $n=3$ . **(B)** Baculovirus expression of CC constructs with native (SP-CC) or PPTLS (PP-CC) signal peptide in *T.ni* insect cells. Protein was harvested and purified two days post infection, followed by transfer to PVDF membrane and sequenced by Edman degradation where the first six residues were identified (Ser-Glu-Iso-Thr-Phe-Glu). **(C)** Signal peptide prediction of TMED7 by SignalP V. 4.0 shows that the first 34 residues are a signal peptide with the mature protein starts at Ser<sup>35</sup>.

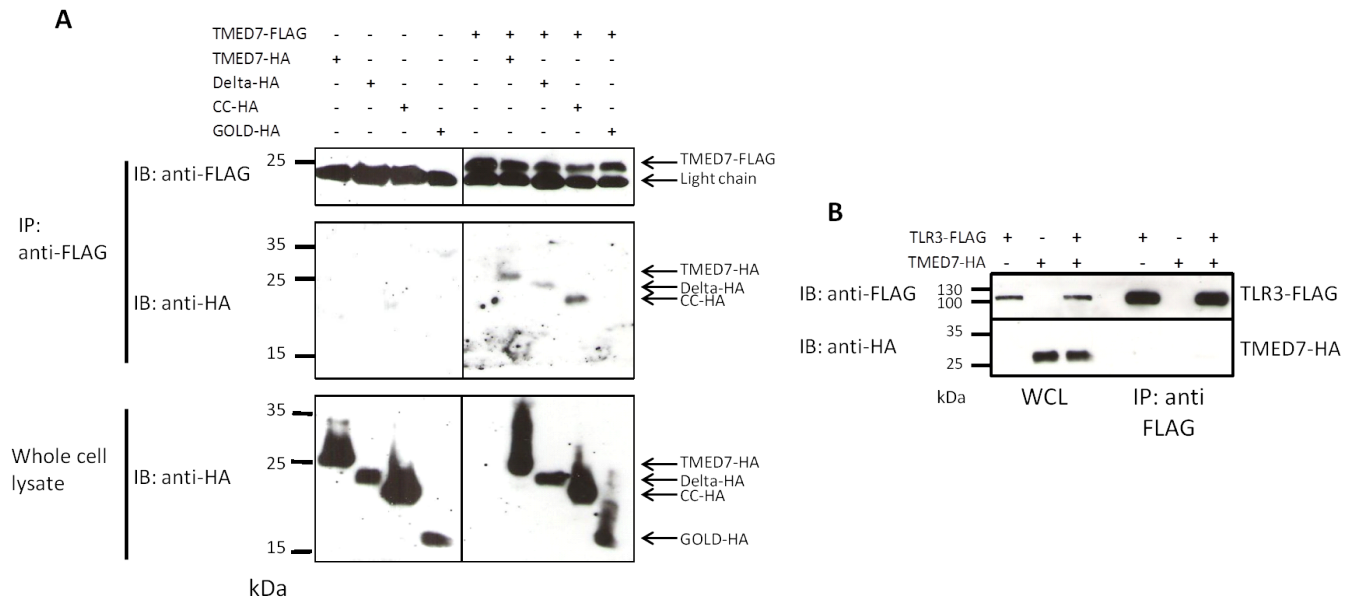

**Fig. S3. TMED7 oligomerization and interaction with TLR4.** This figure is related to Figure 2. (A) TMED7 requires the coiled-coil domain to oligomerize. THP-1 macrophages were transduced with lentivirus as shown in the figure to express HA-tagged TMED7 and the truncated mutants. Three days post transduction protein was harvested and immunoprecipitated. (B) TMED7 does not interact with TLR3. HEK293T cells were transiently transfected with plasmids as indicated in the figure and lysed two days post transfection. Overexpressed proteins were immunoprecipitated. In both experiments, immunoprecipitation was carried out using anti-FLAG M2 magnetic beads and analyzed using Western blot. Anti-HA antibody was used to detect the presence of co-immunoprecipitated proteins due to protein-protein interaction. WCL: whole cell lysate. Western blots are representative of  $n=3$ .

**A**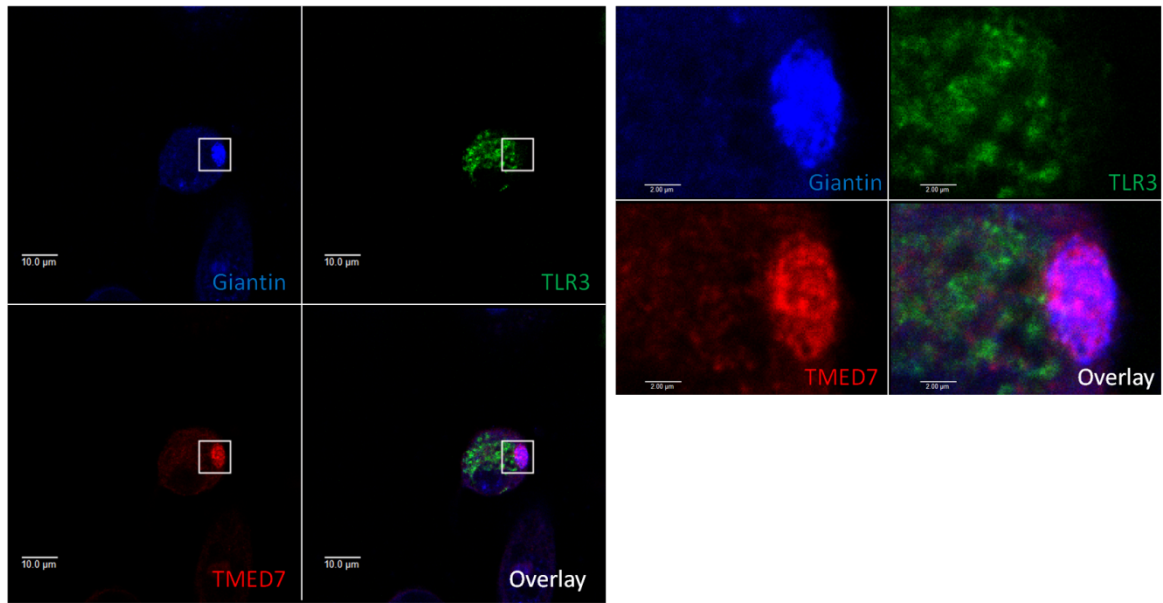**B**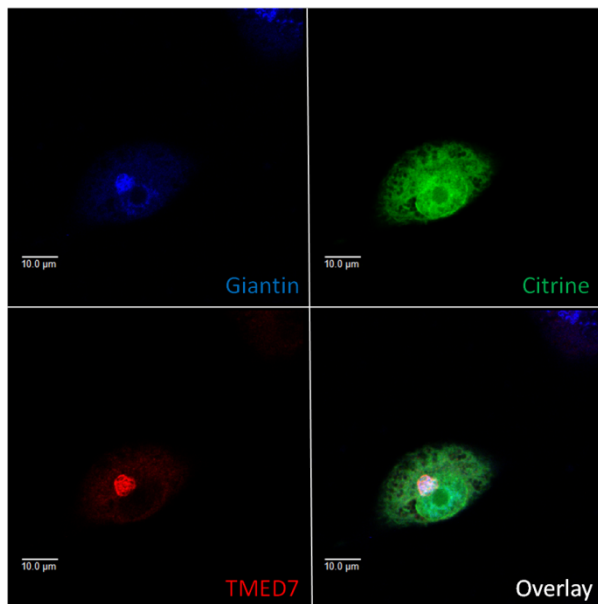

**Fig. S4. TMED7 does not colocalize with TLR3 in THP-1 macrophages.** THP-1 macrophages were transduced with lentivirus and incubated for three days. The cells were permeabilized and HA-tagged TMED7 were labelled with AlexaFluor633 (red) whereas transduced TLR3 was tagged with C-terminal mCitrine (green) (A). Right panel shows the zoomed area in the white box in left panel. (B) mCitrine on its own did not colocalize with TMED7 in THP-1 macrophages. Approximately 20 cells were observed to have similar staining pattern in each condition from two independent experiments. Scale bar is 10 µm.

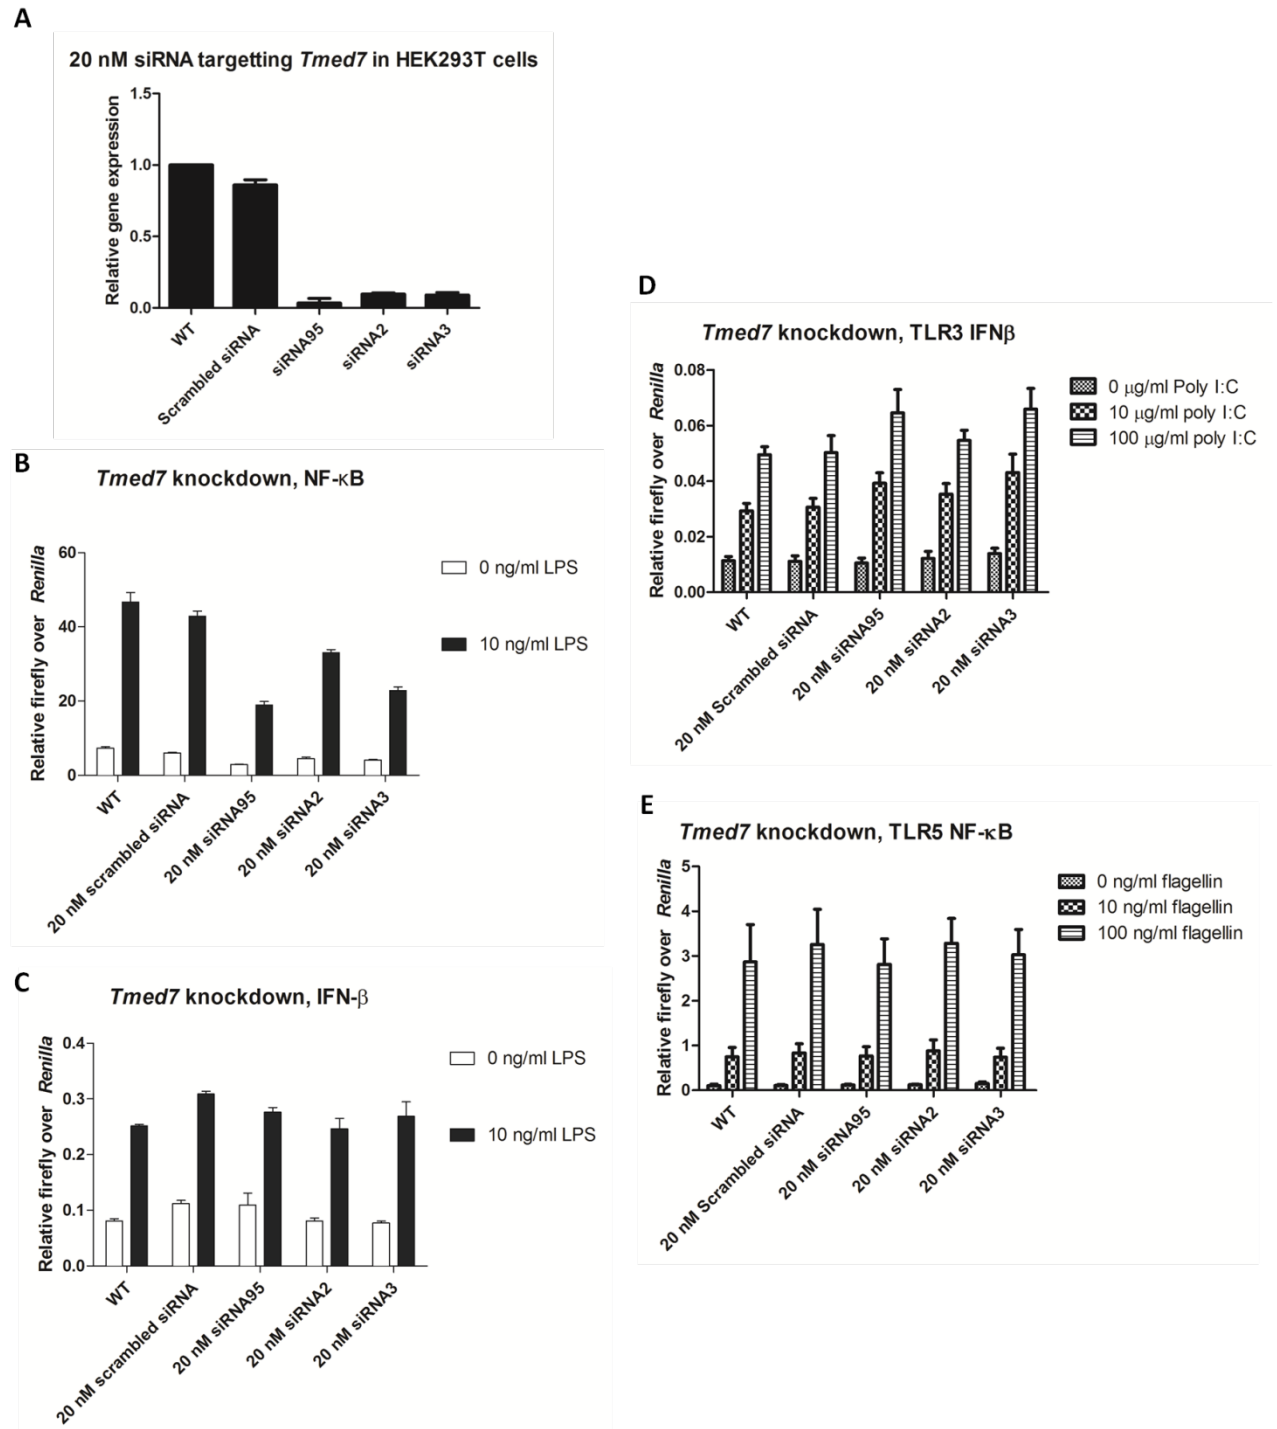

**Fig. S5. *Tmed7* knockdown specifically reduces MyD88-dependent TLR4 signaling.** This figure is related to Figure 4. In all panels, HEK293 cells were transfected with siRNA as indicated 3 days prior to DNA plasmid transfection. Cells were then transiently transfected with TLR4, MD2, CD14, pHRG, and NF- $\kappa$ B luciferase (A) or TRAM-FLAG and IFN $\beta$  luciferase (B) and stimulated with LPS for 6 hours. (C) HEK293 cells were transfected with TLR3-FLAG, pHRG, and IFN $\beta$  luciferase and stimulated with poly I:C for 6 hours. (D) HEK293 cells were transfected with pHRG and NF- $\kappa$ B luciferase, and stimulated with flagellin for 6 hours. Data is presented as firefly luciferase activity normalized against *Renilla* luciferase activity on Y-axis. Data is from a representative experiment of  $n=3$ . Error bars represent standard deviation.



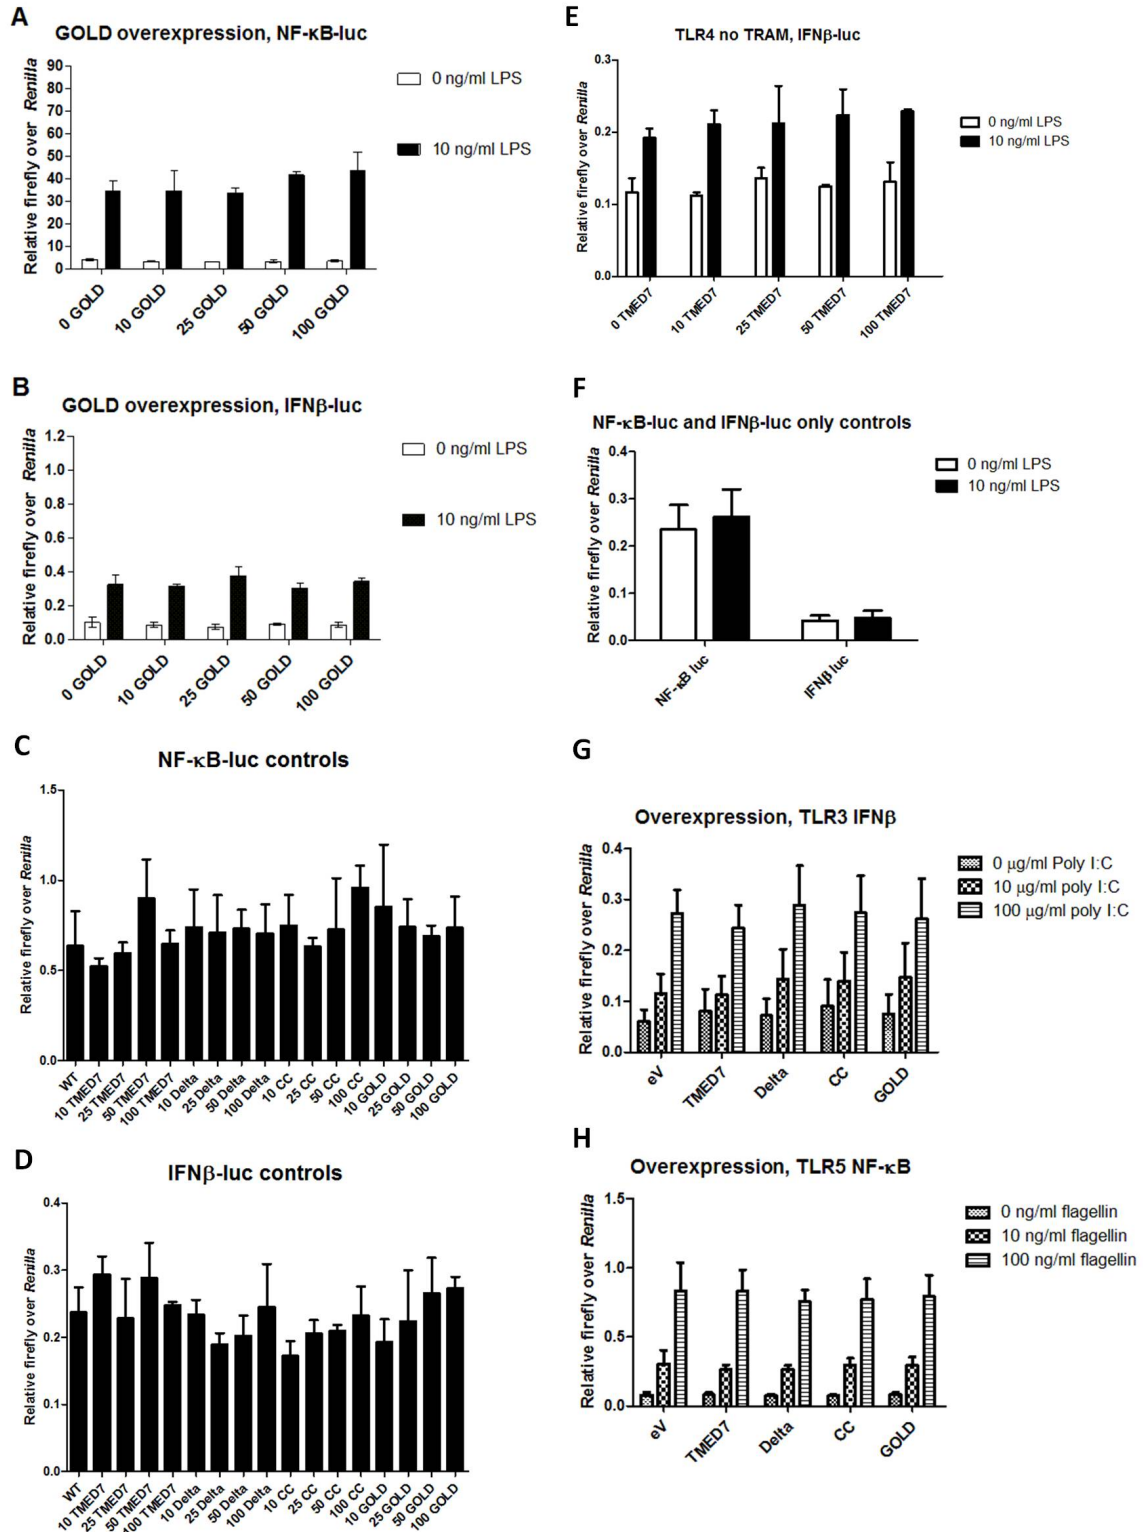

**Fig. S6. Control experiments of the luciferase reporter assays in HEK293 cells to ensure the specificity of the effect of TMED7 on TLR4 signaling.** This figure is related to Figures 5 and 6. GOLD-HA was used as a negative control in the reporter assay. HEK293 cells were transfected with TLR4, MD2, CD14, phRG, increasing amount of GOLD-HA, and NF-κB luciferase (A) or TRAM-FLAG and IFNβ luciferase (B) and cells were stimulated with LPS for 6 hours. (C and D) Controls to ensure that the effects of the overexpression observed were specific to TLR4. HEK293 cells were transfected with phRG and either NF-κB luciferase (C)

or IFN $\beta$  luciferase (**D**), with increasing plasmids indicated on the X-axis. Two days post transfection, luciferase activities were measured. (**E**) TRAM is required for IFN $\beta$  luciferase activation by TMED7. Cells were transfected as in (**B**) without TRAM-FLAG plasmid, and with increasing amount of TMED7-HA and stimulated with LPS for 6 hours. (**F**) HEK293 cells were transfected with phRG and either NF- $\kappa$ B luciferase or IFN $\beta$  luciferase and stimulated with LPS for 6 hours. (**G**) HEK293 cells were transfected with TLR3-FLAG, phRG, IFN $\beta$  luciferase, and the plasmid indicated on X-axis and stimulated with poly I:C for 6 hours. (**H**) HEK293 cells were transfected with phRG, NF- $\kappa$ B luciferase, and plasmids indicated on the X-axis and stimulated with flagellin for 6 hours. Data is presented as firefly luciferase activity normalized against *Renilla* luciferase activity on Y-axis. Data is from a representative experiment of  $n=3$ . Error bars represent standard deviation.

A

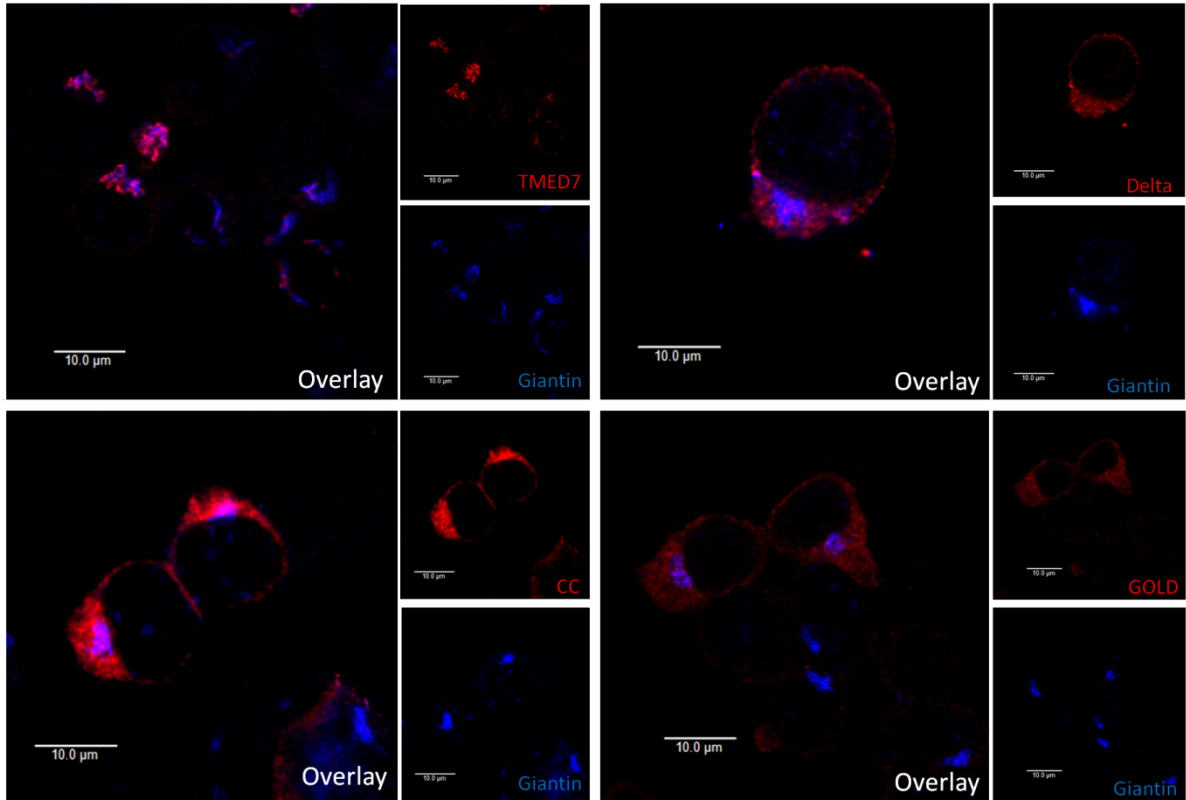

**B**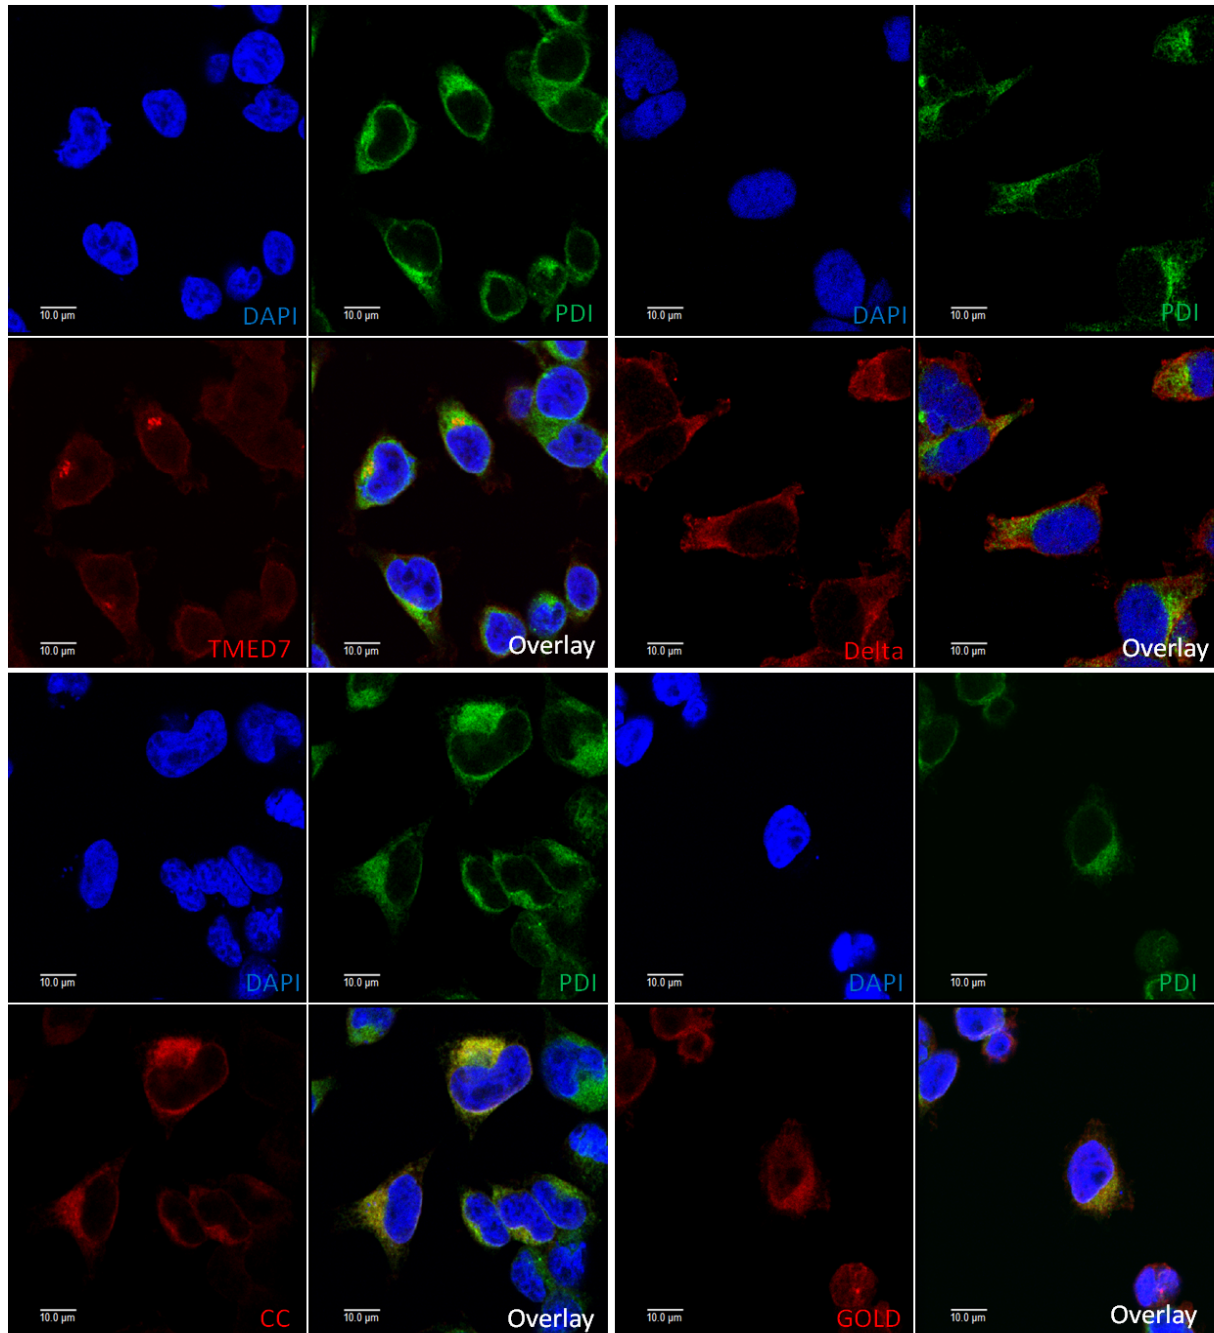

**Fig. S7. Golgi localization of TMED7 in HEK293T cells due to its cytosolic tail.** HEK293T cells were transiently transfected with HA-tagged TMED7, Delta, CC, or GOLD and incubated for 48 hours. Cells were then fixed, permeabilized, and immunofluorescently labelled to detect HA-tagged proteins (red) and Giantin (blue in A) or PDI (green in B). In (B) the nuclei were stained in DAPI. Approximately 20 cells were observed to have similar staining pattern in each condition from two independent experiments. Scale bar is 10 μm.

**Table S1. Primers for Gateway cloning for TMED7 CC, and GOLD with C-terminal FLAG or HA tag.** Underlined sequence is attB1 site; italicized sequences are attB2 sites. Sequences in bold are either start site (ATG) or stop site (CTA), followed by either TMED7 gene-specific sequence, or FLAG and TMED7 gene-specific sequence, or HA and TMED7 gene-specific sequence.

|               |                                                                                                   |
|---------------|---------------------------------------------------------------------------------------------------|
| TMED7 Fw      | <u>GGGGACAAGTTTGTACAAAAAAGCAGGCTTCACCAT</u> <b>GGGCCCCGCG</b><br>GCCGGGGTCCGCGCAG                 |
| TMED7 FLAG Rv | <i>GGGGACCACTTTGTACAAGAAAGCTGGGTCCT</i> ACTTATCGTCGTCATC<br>CTTGTAATCTGATCCAACACGAGTTGT           |
| TMED7 HA Rv   | <i>GGGGACCACTTTGTACAAGAAAGCTGGGTCCT</i> <b>AAGCGTAGTCTGGGA</b><br>CGTCGTATGGGTATGATCCAACACGAGTTGT |
| CC FLAG Rv    | <i>GGGGACCACTTTGTACAAGAAAGCTGGGTCCT</i> ACTTATCGTCGTCATC<br>CTTGTAATCGGCCACTCTTGTATTTAG           |
| CC HA Rv      | <i>GGGGACCACTTTGTACAAGAAAGCTGGGTCCT</i> <b>AAGCGTAGTCTGGGA</b><br>CGTCGTATGGGTAGGCCACTCTTGTATTTAG |
| GOLD FLAG Rv  | <i>GGGGACCACTTTGTACAAGAAAGCTGGGTCCT</i> ACTTATCGTCGTCATC<br>CTTGTAATCAAGAGCACTGACTCGGTT           |
| GOLD HA Rv    | <i>GGGGACCACTTTGTACAAGAAAGCTGGGTCCT</i> <b>AAGCGTAGTCTGGGA</b><br>CGTCGTATGGGTAAAGAGCACTGACTCGGTT |

**Table S2. Primers for Quikchange mutagenesis to generate Delta mutant of TMED7 with C-terminal HA tag.**

|          |                                                  |
|----------|--------------------------------------------------|
| Delta Fw | CAGGTATTTCTTTTGAAAAGCTACCCATACGACGTCCCAGACTACGCT |
| Delta Rv | AGCGTAGTCTGGGACGTCGTATGGGTAGCTTTTCAAAGAAATACCTG  |

**Table S3. Amount of DNA plasmid transfected into HEK293 cells using jetPEI reagent for luciferase gene reporter assay.** Amounts shown here are per well in a 96-well plate.

For TLR4 NF- $\kappa$ B luciferase

|                                     |                           |
|-------------------------------------|---------------------------|
| TLR4                                | 10 ng                     |
| CD14                                | 10 ng                     |
| MD2                                 | 1 ng                      |
| NF- $\kappa$ B-luc                  | 10 ng                     |
| phRG                                | 5 ng                      |
| HA-tagged TMED7, Delta, CC, or GOLD | 0, 1, 2, 5, 10 ng         |
| pcDNA3.1                            | to make a total of 100 ng |

For TLR4 IFN $\beta$  luciferase

|                                         |                           |
|-----------------------------------------|---------------------------|
| TLR4                                    | 10 ng                     |
| CD14                                    | 10 ng                     |
| MD2                                     | 1 ng                      |
| TRAM-FLAG                               | 2 ng                      |
| p125:IFN $\beta$ -luc                   | 20 ng                     |
| phRG                                    | 5 ng                      |
| HA-tagged TMED7, $\Delta$ , CC, or GOLD | 0, 1, 2, 5, 10 ng         |
| pcDNA3.1                                | to make a total of 100 ng |

**Table S4. Amount of DNA plasmid transfected into HEK293T cells using jetPEI reagent for confocal microscopy and co-immunoprecipitation experiments.** Amounts shown here are per well in a 6-well plate.

|                                      |                              |
|--------------------------------------|------------------------------|
| TLR4-citrine                         | 1 $\mu$ g                    |
| CD14                                 | 500 ng                       |
| MD2                                  | 100 ng                       |
| pcDNA3: TRAM                         | 200 ng                       |
| HA-tagged TMED7, Delta, CC, and GOLD | 500 ng                       |
| pcDNA3.1                             | to make a total of 3 $\mu$ g |

**Table S5. Amount of DNA plasmid transfected into HEK293T cells using jetPEI reagent for flow cytometry experiments. Amounts shown here are per well in a 6-well plate.**

|                                      |                        |
|--------------------------------------|------------------------|
| FLAG-TLR4                            | 1μg                    |
| MD2                                  | 100ng                  |
| HA-tagged TMED7, Delta, CC, and GOLD | 1μg                    |
| pcDNA3.1                             | to make a total of 3μg |

**Table S6. Sequences of siRNA duplexes used in RNAi experiments.**

|                    |                           |
|--------------------|---------------------------|
| siRNA95 sense      | GUCAGUAGGAGAAGCCCUCAUUCUU |
| siRNA95 anti-sense | AAGAAUGAGGGCUUCUCCUACUGAC |
| siRNA2 sense       | AAGCUUUUUCUCAGAUAAAUU     |
| siRNA2 anti-sense  | UUUAUCUGAGAAAAAGCUUUU     |
| siRNA3 sense       | GCUUUUUCUCAGAUAAAAGUU     |
| siRNA3 anti-sense  | CUUUUAUCUGAGAAAAAGCUU     |

**Table S7. Sequences of gene-specific primers used in conventional and quantitative PCR.**

|          |                       |
|----------|-----------------------|
| GAPDH Fw | GAAGGTGAAGGTCGGAGTC   |
| GAPDH Rv | GAAGATGGTGATGGGATTTC  |
| TMED7 Fw | GCTCTTACCCAGATGGAATCT |
| TMED7 Rv | AGTTGTGGTGGTTCTTTTATC |
| TRAM Fw  | TTCCTGCCCTCTTTCTCTCTC |
| TRAM Rv  | AACATCTCTTCCACGCTCTGA |
